# Supplementary material
Source: publisher figshare collection journal article supplement (https://sage.figshare.com/ndownloader/files/38094133)

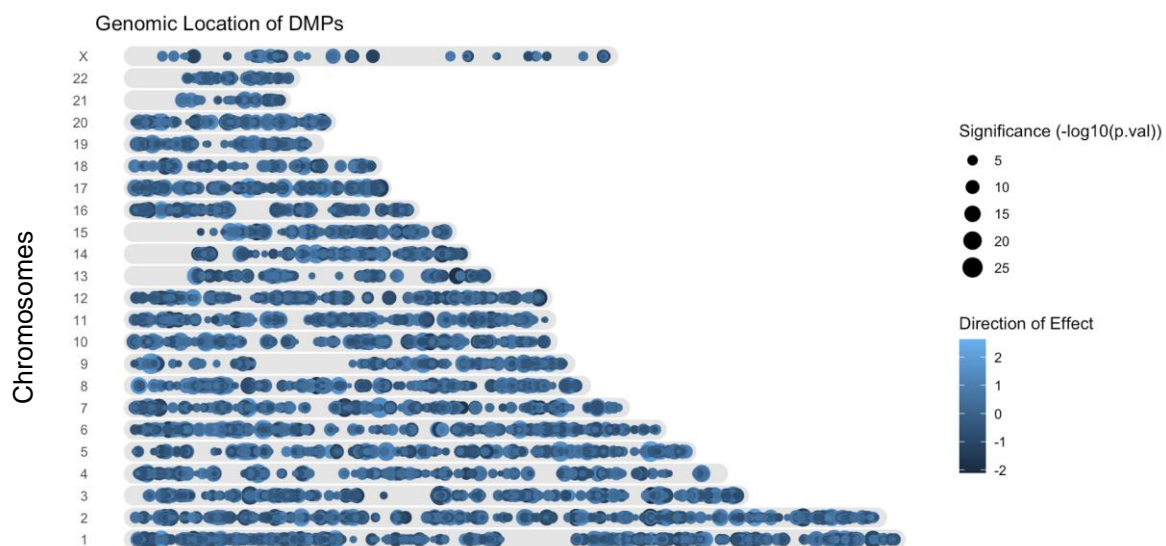

Figure S1. Global changes in DNA methylation post HCT

Supplement: Supplementary file 1 [file 38094133]
